# Supplementary material for: Risk of Hemolytic Uremic Syndrome Related to Treatment of Escherichia coli O157 Infection with Different Antimicrobial Classes
Source: MDPI journal article supplement (doi:10.3390/microorganisms9091997), 2021-09-21
Supplement: s1 [file s1]

# ***E. coli* O157 COHORT STUDY: MEDICAL PROVIDER FOLLOW-UP**

## **COMPLETE "MEDICAL PROVIDER FOLLOW-UP" FORM FOR EACH MEDICAL PROVIDER LISTED CONTACT AT LEAST 3 WEEKS AFTER ILLNESS ONSET DATE**

**COHORT Study ID** [COHORT\_ID] \_\_\_\_ (2 letter state code and number, eg XX001)

**State Laboratory Isolate ID Number\*** \_\_\_\_ [SLABS\_ID] \_\_\_\_ \*This is required

**Illness onset date** \_\_\_\_ [ILL\_ONSET] \_\_\_\_

[\*\*For Medical Provider Info variables, change "MP1" to "MP2", "MP3" or "MP4" for providers 2, 3, or 4, respectively.\*\*]

**Medical provider** 1 2 3 4, # Visits: \_\_\_\_ [MC\_MP1] \_\_\_\_

**Date of first visit:** \_\_\_\_ [MP1\_DT] \_\_\_\_ (mm/dd/yy)

**Physician name:** \_\_\_\_ [MP1\_PHY] \_\_\_\_

**Clinic/ER name:** \_\_\_\_ [MP1\_CLN] \_\_\_\_ **Address:** \_\_\_\_ [MP1\_ADD] \_\_\_\_

**City, State:** \_\_\_\_ [MP1\_CT], [MP1\_ST] \_\_\_\_ **Phone:** \_\_\_\_ [MP1\_PHO] \_\_\_\_

[\*\*For ALL variables below, add "\_2", "\_3", or "\_4" to END of variable name for providers 2, 3, or 4, respectively.\*\*]

**(COMPLETE AFTER CONTACTING MEDICAL PROVIDER)** Were you able to complete this "Medical provider follow-up" form for this medical provider? [MED\_COM]

Yes..... 1, **IF YES,** Date completed \_\_\_\_ [MED\_COM\_DT] \_\_\_\_ (mm/dd/yy)

No..... 2

→ **IF NO,** why were you not able to complete a "Medical provider Follow-Up" form? [MED\_COM\_RE]

Provider information incorrect..... 1

Provider refused access to records..... 2

Records at provider unavailable..... 3

Other..... 4

→ **SPECIFY** \_\_\_\_ [MED\_COM\_SPEC3] \_\_\_\_

→ **SPECIFY** \_\_\_\_ [MED\_COM\_SPEC4] \_\_\_\_

1. **Date of the first visit for this illness** to this medical provider? \_\_\_\_ [MED\_FST\_DT] \_\_\_\_  
mo day yr  
Don't know/Not sure..... 777777

2. **How many visits** were made to this medical provider in the first 10 days of this illness? [MED\_VS] \_\_\_\_  
Don't know/Not sure..... 77

3A. **Patient blood type** A..... 1 O..... 4  
[MED\_BLTYPE] B..... 2 Don't know/Not sure..... 7  
AB..... 3

3B. **Height:** \_\_\_\_ [MED\_HT] \_\_\_\_ ft/in OR cm (circle), **Date (closest to illness onset):** \_\_\_\_ [MED\_HT\_DT] \_\_\_\_ DK/Not sure..... 777777

**Weight(admit):** \_\_\_\_ [MED\_WT] \_\_\_\_ lbs OR kg (circle), **Date (closest to illness onset):** \_\_\_\_ [MED\_WT\_DT] \_\_\_\_ DK/Not sure..... 777777

4. A. **What date** was stool submitted for testing / culture by this medical provider? \_\_\_\_ [MED\_STOOL] \_\_\_\_  
mo day yr  
Don't know/Not sure..... 777777  
Not done..... **GO TO 5**... 999999

B. **Was Shiga toxin testing performed?** [MED\_SHIGA] Yes..... 1 No..... 2 Don't know/Not sure..... 7

→ **IF YES,** → **What was the result?** [MED\_SHIG\_RES] Positive... 1 Negative... 2 Don't know/Not sure..... 7

→ **What date** were results reported? \_\_\_\_ [MED\_SHIG\_DT] \_\_\_\_

mo day yr

Don't know/Not sure..... 777777

C. **What date** was *E. coli* O157 isolation reported from the lab? \_\_\_\_ [MED\_ECOLI] \_\_\_\_  
mo day yr

Don't know/Not sure..... 777777

8. **COMPLETE ROW FOR EACH ANTIBIOTIC DOCUMENTED IN CHART BY THIS PROVIDER**
- |    |                                                                                          |
|----|------------------------------------------------------------------------------------------|
| A. | AB names and codes ( <b>ADMIN PACKET</b> )                                               |
| B. | Start date of the prescription or date given                                             |
| C. | Number of days of treatment prescribed or given? (eg 10 days, 14 days)                   |
| D. | Was this antibiotic discontinued <b>because</b> of the diagnosis of <i>E. coli</i> O157? |

| A. Antibiotic Name | Ab Code          | B. Start date (mmddyy) | C. # DAYS prescribed | D. Discontinued because of <i>E. coli</i> O157 diagnosis? |
|--------------------|------------------|------------------------|----------------------|-----------------------------------------------------------|
|                    | [MED_ABX1]       | [MED_ABX1_ST]          | [MED_ABX1_DY]        | Yes(1) No(2) DK(7)<br>[MED_ABX1 DIS]                      |
|                    | [MED_ABX2]       | [MED_ABX2_ST]          | [MED_ABX2_DY]        | Yes(1) No(2) DK(7)<br>[MED_ABX2 DIS]                      |
|                    | [MED_ABX3]       | [MED_ABX3_ST]          | [MED_ABX3_DY]        | Yes(1) No(2) DK(7)<br>[MED_ABX3 DIS]                      |
| OTH- SPECIFY       | 52<br>[MED_OTH1] | [MED_OTH1_ST]          | [MED_OTH1_DY]        | Yes(1) No(2) DK(7)<br>[MED_OTH1 DIS]                      |
| OTH- SPECIFY       | 53<br>[MED_OTH2] | [MED_OTH2_ST]          | [MED_OTH2_DY]        | Yes(1) No(2) DK(7)<br>[MED_OTH2 DIS]                      |

9. At the **first visit to this medical provider for this illness**, did the patient indicate a **history** of the following signs and/or symptoms?
- |                              |        |       |       |
|------------------------------|--------|-------|-------|
| A. Fever? [MED_FV]           | Yes(1) | No(2) | DK(7) |
| B. Nausea? [MED_NS]          | Yes(1) | No(2) | DK(7) |
| C. Vomiting? [MED_VM]        | Yes(1) | No(2) | DK(7) |
| D. Diarrhea? [MED_DA]        | Yes(1) | No(2) | DK(7) |
| E. Bloody stool? [MED_BLDST] | Yes(1) | No(2) | DK(7) |

(9 days after illness onset date).

**10. FOR EACH VISIT TO THIS MEDICAL PROVIDER THAT OCCURRED DURING THE FIRST 10 DAYS OF THIS ILLNESS (VISIT#1-4), RECORD THE DATE OF THE VISIT, SYMPTOMS, LABORATORY VALUES, AND INFORMATION ON TREATMENTS ON THAT DAY**

- A. Temperature? (Enter 777.7=DK, circle C or F)  
 B. Vomiting reported or documented on this day?  
 C. Diarrhea reported or documented on this day?  
 D. Blood (visible or occult) in stool reported or documented on this day?
- E. BUN  
 F. Creatinine  
 G. LDH  
 H. Amylase  
 I. Lipase  
 J. Bilirubin  
 K. ALT  
 L. AST
- M. Highest WBC count (per mm<sup>3</sup>)  
 N. Hematocrit (%)  
 O. Hemoglobin  
 P. Platelet count (per mm<sup>3</sup>)
- Q. Blood smear performed, **IF yes**, Q1, Were erythrocyte fragments noted  
**IF yes**, Specify (eg schistocytes, burr cells, helmet cells)
- R. Urinalysis performed **IF yes**, J1, Hematuria?, **IF yes**, Specify (eg 1+, 2+, 3+, 4+)  
 J2, Proteinuria? **IF yes**, Specify (eg 1+, 2+, 3+, 4+)
- S. Were IV fluids administered  
**If Yes**, S1. Type of fluids  
     Normal saline.....1  
     ½ Normal saline.....2  
     D5W.....3  
     Other.....4, **If other, specify other fluid type.**  
     **S2. Volume (Liters / day)**
- T. Were blood products given  
**If Yes**, Which products: T1. Packed cells T2. Whole blood T3. Platelets T4. Plasma
- U. Anti-diarrhea medications given or prescribed (lomotil (diphenoxylate), loperamide, bismuth subsalicylate, kaolin pectin)  
**If Yes**, U1. Biologic agents: probiotics  
     U2. Anti-motility agents: lomotil (diphenoxylate), loperamide  
     U3. Adsorbent agents: bismuth subsalicylate, kaolin pectin
- V. Other anti-diarrheal agents  
**If Yes**, V1. Specify

| Date                   | Visit #1<br>[MED_1] / /          | Visit #2<br>[MED_2] / /          | Visit #3<br>[MED_3] / /          | Visit #4<br>[MED_4] / /          |
|------------------------|----------------------------------|----------------------------------|----------------------------------|----------------------------------|
| <b><u>SYMPTOMS</u></b> |                                  |                                  |                                  |                                  |
| <b>A. Temp</b>         | [MED_1_TEMP]<br>F or C           | [MED_2_TEMP]<br>F or C           | [MED_3_TEMP]<br>F or C           | [MED_4_TEMP]<br>F or C           |
| <b>B. Vomit</b>        | [MED_1_VOMIT]<br>Y(1) N(2) DK(7) | [MED_2_VOMIT]<br>Y(1) N(2) DK(7) | [MED_3_VOMIT]<br>Y(1) N(2) DK(7) | [MED_4_VOMIT]<br>Y(1) N(2) DK(7) |
| <b>C. Diarrhea</b>     | [MED_1_DA]<br>Y(1) N(2) DK(7)    | [MED_2_DA]<br>Y(1) N(2) DK(7)    | [MED_3_DA]<br>Y(1) N(2) DK(7)    | [MED_4_DA]<br>Y(1) N(2) DK(7)    |
| <b>D. Blood</b>        | [MED_1_BLOOD]<br>Y(1) N(2) DK(7) | [MED_2_BLOOD]<br>Y(1) N(2) DK(7) | [MED_3_BLOOD]<br>Y(1) N(2) DK(7) | [MED_4_BLOOD]<br>Y(1) N(2) DK(7) |

|                                        |                                               |                                               |                                               |                                               |
|----------------------------------------|-----------------------------------------------|-----------------------------------------------|-----------------------------------------------|-----------------------------------------------|
| <b><u>LABORATORY VALUES</u></b>        |                                               |                                               |                                               |                                               |
| <b>E. BUN</b>                          | [MED_1_BUN]                                   | [MED_2_BUN]                                   | [MED_3_BUN]                                   | [MED_4_BUN]                                   |
| <b>BUN unit</b>                        | mg/dL or ____                                 | mg/dL or ____                                 | mg/dL or ____                                 | mg/dL or ____                                 |
| <b>F. Cr</b>                           | [MED_1_CR]                                    | [MED_2_CR]                                    | [MED_3_CR]                                    | [MED_4_CR]                                    |
| <b>Cr unit</b>                         | mg/dL or ____                                 | mg/dL or ____                                 | mg/dL or ____                                 | mg/dL or ____                                 |
| <b>G. LDH</b>                          | [MED_1_LDH]                                   | [MED_2_LDH]                                   | [MED_3_LDH]                                   | [MED_4_LDH]                                   |
| <b>LDH unit</b>                        | U/L or ____                                   | U/L or ____                                   | U/L or ____                                   | U/L or ____                                   |
| <b>H. Amylase</b>                      | [MED_1_AMY]                                   | [MED_2_AMY]                                   | [MED_3_AMY]                                   | [MED_4_AMY]                                   |
| <b>unit (1) = U/L or (text)</b>        | [MED_1_AMY_U] or [MED_1_AMY_UO]               | [MED_2_AMY_U] or [MED_2_AMY_UO]               | [MED_3_AMY_U] or [MED_3_AMY_UO]               | [MED_4_AMY_U] or [MED_4_AMY_UO]               |
| <b>I. Lipase</b>                       | [MED_1_LIPASE]                                | [MED_2_LIPASE]                                | [MED_3_LIPASE]                                | [MED_4_LIPASE]                                |
| <b>Lipase unit</b>                     | U/L or ____                                   | U/L or ____                                   | U/L or ____                                   | U/L or ____                                   |
| <b>J. Bilirubin</b>                    | [MED_1_BIL]                                   | [MED_2_BIL]                                   | [MED_3_BIL]                                   | [MED_4_BIL]                                   |
| <b>Bilirubin unit</b>                  | mg/dL or ____                                 | mg/dL or ____                                 | mg/dL or ____                                 | mg/dL or ____                                 |
| <b>K. Transaminase Alanine (ALT)</b>   | [MED_1_ALT]                                   | [MED_2_ALT]                                   | [MED_3_ALT]                                   | [MED_4_ALT]                                   |
| <b>ALT unit</b>                        | U/L or ____                                   | U/L or ____                                   | U/L or ____                                   | U/L or ____                                   |
| <b>L. Transaminase Aspartate (AST)</b> | [MED_1_AST]                                   | [MED_2_AST]                                   | [MED_3_AST]                                   | [MED_4_AST]                                   |
| <b>AST unit</b>                        | U/L or ____                                   | U/L or ____                                   | U/L or ____                                   | U/L or ____                                   |
| <b>M. WBC</b>                          | [MED_1_WBC]                                   | [MED_2_WBC]                                   | [MED_3_WBC]                                   | [MED_4_WBC]                                   |
| <b>N. Hct</b>                          | [MED_1_HCT]                                   | [MED_2_HCT]                                   | [MED_3_HCT]                                   | [MED_4_HCT]                                   |
| <b>O. Hb</b>                           | [MED_1_HEMO]                                  | [MED_2_HEMO]                                  | [MED_3_HEMO]                                  | [MED_4_HEMO]                                  |
| <b>unit (1) = MG/DL or (text)</b>      | [MED_1_HEMOU] or [MED_1_HEMOOU]               | [MED_2_HEMOU] or [MED_2_HEMOOU]               | [MED_3_HEMOU] or [MED_3_HEMOOU]               | [MED_4_HEMOU] or [MED_4_HEMOOU]               |
| <b>P. Plt</b>                          | [MED_1_HPLAT]                                 | [MED_2_HPLAT]                                 | [MED_3_HPLAT]                                 | [MED_4_HPLAT]                                 |
| <b>Q. Blood smear</b>                  | [MED_1_BLOOD_SM]<br>Y(1) N(2) DK(7)           | [MED_2_BLOOD_SM]<br>Y(1) N(2) DK(7)           | [MED_3_BLOOD_SM]<br>Y(1) N(2) DK(7)           | [MED_4_BLOOD_SM]<br>Y(1) N(2) DK(7)           |
| <b>Q1 RBC frags</b>                    | [MED_1_RBC]<br>Y(1) N(2) DK(7)                | [MED_2_RBC]<br>Y(1) N(2) DK(7)                | [MED_3_RBC]<br>Y(1) N(2) DK(7)                | [MED_4_RBC]<br>Y(1) N(2) DK(7)                |
| <b>Q1 RBC specify</b>                  | [MED_1_RBC_SPEC]                              | [MED_2_RBC_SPEC]                              | [MED_3_RBC_SPEC]                              | [MED_4_RBC_SPEC]                              |
| <b>R. Urinalysis</b>                   | [MED_1_URINE]<br>Y(1) N(2) DK(7)              | [MED_2_URINE]<br>Y(1) N(2) DK(7)              | [MED_3_URINE]<br>Y(1) N(2) DK(7)              | [MED_4_URINE]<br>Y(1) N(2) DK(7)              |
| <b>R1 Hematuria</b>                    | [MED_1_HEMAT]<br>Y(1) N(2) DK(7)              | [MED_2_HEMAT]<br>Y(1) N(2) DK(7)              | [MED_3_HEMAT]<br>Y(1) N(2) DK(7)              | [MED_4_HEMAT]<br>Y(1) N(2) DK(7)              |
| <b>R1 Specify (circle or write)</b>    | [MED_1_HEMAT_SPEC]<br>1+(1) 2+(2) 3+(3) 4+(4) | [MED_2_HEMAT_SPEC]<br>1+(1) 2+(2) 3+(3) 4+(4) | [MED_3_HEMAT_SPEC]<br>1+(1) 2+(2) 3+(3) 4+(4) | [MED_4_HEMAT_SPEC]<br>1+(1) 2+(2) 3+(3) 4+(4) |
| <b>R2 Proteinuria</b>                  | [MED_1_PROT]<br>Y(1) N(2) DK(7)               | [MED_2_PROT]<br>Y(1) N(2) DK(7)               | [MED_3_PROT]<br>Y(1) N(2) DK(7)               | [MED_4_PROT]<br>Y(1) N(2) DK(7)               |
| <b>R2 Specify (circle or write)</b>    | [MED_1_PROT_SPEC]<br>1+(1) 2+(2) 3+(3) 4+(4)  | [MED_2_PROT_SPEC]<br>1+(1) 2+(2) 3+(3) 4+(4)  | [MED_3_PROT_SPEC]<br>1+(1) 2+(2) 3+(3) 4+(4)  | [MED_4_PROT_SPEC]<br>1+(1) 2+(2) 3+(3) 4+(4)  |

| <b>INFORMATION ON TREATMENTS</b> |                                       |                                       |                                       |                                       |
|----------------------------------|---------------------------------------|---------------------------------------|---------------------------------------|---------------------------------------|
| <b>S. IV fluids</b>              | [MED_1_IV]<br>Y(1) N(2) DK(7)         | [MED_2_IV]<br>Y(1) N(2) DK(7)         | [MED_3_IV]<br>Y(1) N(2) DK(7)         | [MED_4_IV]<br>Y(1) N(2) DK(7)         |
| <b>S1. Type of fluids</b>        | [MED_1_IV_TY]<br>1 2 3 4              | [MED_2_IV_TY]<br>1 2 3 4              | [MED_3_IV_TY]<br>1 2 3 4              | [MED_4_IV_TY]<br>1 2 3 4              |
| <b>Specify other fluids</b>      | [MED_1_IV_OTH]                        | [MED_2_IV_OTH]                        | [MED_3_IV_OTH]                        | [MED_4_IV_OTH]                        |
| <b>S2. Volume (Liters/day)</b>   | [MED_1_IV_VOL]                        | [MED_2_IV_VOL]                        | [MED_3_IV_VOL]                        | [MED_4_IV_VOL]                        |
| <b>T. Blood products</b>         | [MED_1_BLD_PR]<br>Y(1) N(2) DK(7)     | [MED_2_BLD_PR]<br>Y(1) N(2) DK(7)     | [MED_3_BLD_PR]<br>Y(1) N(2) DK(7)     | [MED_4_BLD_PR]<br>Y(1) N(2) DK(7)     |
| <b>T1. Packed cells</b>          | [MED_1_PCELLS]<br>Y(1) N(2) DK(7)     | [MED_2_PCELLS]<br>Y(1) N(2) DK(7)     | [MED_3_PCELLS]<br>Y(1) N(2) DK(7)     | [MED_4_PCELLS]<br>Y(1) N(2) DK(7)     |
| <b>T2. Whole blood</b>           | [MED_1_WCELLS]<br>Y(1) N(2) DK(7)     | [MED_2_WCELLS]<br>Y(1) N(2) DK(7)     | [MED_3_WCELLS]<br>Y(1) N(2) DK(7)     | [MED_4_WCELLS]<br>Y(1) N(2) DK(7)     |
| <b>T3. Platelets</b>             | [MED_1_PLAT]<br>Y(1) N(2) DK(7)       | [MED_2_PLAT]<br>Y(1) N(2) DK(7)       | [MED_3_PLAT]<br>Y(1) N(2) DK(7)       | [MED_4_PLAT]<br>Y(1) N(2) DK(7)       |
| <b>T4. Plasma</b>                | [MED_1_PLASMA]<br>Y(1) N(2) DK(7)     | [MED_2_PLASMA]<br>Y(1) N(2) DK(7)     | [MED_3_PLASMA]<br>Y(1) N(2) DK(7)     | [MED_4_PLASMA]<br>Y(1) N(2) DK(7)     |
| <b>U. Anti-diarrheal</b>         | [MED_1_ANTIDA]<br>Y(1) N(2) DK(7)     | [MED_2_ANTIDA]<br>Y(1) N(2) DK(7)     | [MED_3_ANTIDA]<br>Y(1) N(2) DK(7)     | [MED_4_ANTIDA]<br>Y(1) N(2) DK(7)     |
| <b>U1. Probiotic</b>             | [MED_1_PROB]<br>Y(1) N(2) DK(7)       | [MED_2_PROB]<br>Y(1) N(2) DK(7)       | [MED_3_PROB]<br>Y(1) N(2) DK(7)       | [MED_4_PROB]<br>Y(1) N(2) DK(7)       |
| <b>U2. Anti-motility</b>         | [MED_1_MOT]<br>Y(1) N(2) DK(7)        | [MED_2_MOT]<br>Y(1) N(2) DK(7)        | [MED_3_MOT]<br>Y(1) N(2) DK(7)        | [MED_4_MOT]<br>Y(1) N(2) DK(7)        |
| <b>U3. Adsorbent</b>             | [MED_1_ADSORB]<br>Y(1) N(2) DK(7)     | [MED_2_ADSORB]<br>Y(1) N(2) DK(7)     | [MED_3_ADSORB]<br>Y(1) N(2) DK(7)     | [MED_4_ADSORB]<br>Y(1) N(2) DK(7)     |
| <b>V. Other anti-diarrheal</b>   | MED_1_OTHER_ANTIDA<br>Y(1) N(2) DK(7) | MED_2_OTHER_ANTIDA<br>Y(1) N(2) DK(7) | MED_3_OTHER_ANTIDA<br>Y(1) N(2) DK(7) | MED_4_OTHER_ANTIDA<br>Y(1) N(2) DK(7) |
| <b>D1. Specify</b>               | [MED_1_OTHER_SPEC]                    | [MED_2_OTHER_SPEC]                    | [MED_3_OTHER_SPEC]                    | [MED_4_OTHER_SPEC]                    |
