# Supplementary material for: Risk of Hemolytic Uremic Syndrome Related to Treatment of Escherichia coli O157 Infection with Different Antimicrobial Classes
Source: MDPI journal article supplement (doi:10.3390/microorganisms9091997), 2021-09-21
Supplement: s1 [file s1]

**Supplementary Table S1.** Demographic and clinical characteristics of study participants eligible for inclusion<sup>a</sup> in the primary multivariable adjusted models and participants excluded due to missing data.

| Characteristic                          | Included<br>(N=1155)    | Excluded <sup>b</sup><br>(N=126) | P value <sup>c</sup>    |
|-----------------------------------------|-------------------------|----------------------------------|-------------------------|
| Age, median (IQR), years                | 15 (5–37)               | 24 (7–52)                        | <b>0.01<sup>d</sup></b> |
| Female (%)                              | 596 (51.7) <sup>e</sup> | 75 (59.5)                        | 0.11                    |
| Confirmed HUS (%)                       | 89 (7.7)                | 13 (10.3)                        | 0.30                    |
| <b>Recorded antimicrobial exposure:</b> | <b>No. (%)</b>          | <b>No. (%)</b>                   |                         |
| Any antibiotic                          | 356 (30.8)              | 41 (32.5)                        | 0.69                    |
| Fluoroquinolone                         | 225 (19.5)              | 30 (23.8)                        | 0.24                    |
| Metronidazole                           | 191 (16.5)              | 19 (15.1)                        | 0.80                    |
| Macrolide                               | 12 (1.0)                | 0 (0)                            | 0.62                    |
| β-lactam                                | 55 (4.8)                | 3 (2.4)                          | 0.36                    |
| Sulfonamide                             | 29 (2.5)                | 5 (4.0)                          | 0.37                    |

Abbreviation: HUS, hemolytic uremic syndrome

<sup>a</sup> Some participants eligible for inclusion (i.e., had no missing covariate data) were still excluded from antimicrobial class-specific analyses if the participant was prescribed classes of antimicrobials other than the one of interest.

<sup>b</sup> The 126 participants excluded from the adjusted models were missing data for 1 or more covariates (acetaminophen (n=64), fever (n=60), vomiting (n=9)).

<sup>c</sup> Based on Fisher's exact test except where noted.

<sup>d</sup> Based on Wilcoxon rank-sum test.

<sup>e</sup> Sex was missing for one study participant.

**Supplementary Table S2.** Secondary models for the association between trimethoprim-sulfamethoxazole treatment during the first 7 days of illness and development of HUS.

| Category <sup>a</sup> | HUS definition <sup>b</sup>          | Source of antibiotic exposure data <sup>c</sup> | No. patients included | WBC included as covariate? <sup>d</sup> | Adjusted OR <sup>e</sup> | 95% CI    |
|-----------------------|--------------------------------------|-------------------------------------------------|-----------------------|-----------------------------------------|--------------------------|-----------|
| A                     | Confirmed or suspected               | Documented or reported                          | 789                   | No                                      | 1.80                     | 0.75–4.34 |
|                       |                                      |                                                 |                       | Yes                                     | 1.84                     | 0.75–4.47 |
|                       |                                      | Documented                                      | 846                   | No                                      | 2.43                     | 0.96–6.14 |
|                       |                                      |                                                 |                       | Yes                                     | 2.54                     | 1.00–6.47 |
|                       | Confirmed (suspected excluded)       | Documented or reported                          | 771                   | No                                      | 1.76                     | 0.66–4.69 |
|                       |                                      |                                                 |                       | Yes                                     | 1.76                     | 0.66–4.69 |
|                       |                                      | Documented                                      | 828                   | No <sup>f</sup>                         | 2.37                     | 0.85–6.60 |
|                       |                                      |                                                 |                       | Yes                                     | 2.37                     | 0.85–6.60 |
|                       | Confirmed (suspected considered HUS) | Documented or reported                          | 789                   | No                                      | 1.58                     | 0.60–4.17 |
|                       |                                      |                                                 |                       | Yes                                     | 1.57                     | 0.60–4.14 |
| B                     | Confirmed (suspected excluded)       | Documented or reported                          | 464                   | No                                      | 1.99                     | 0.69–5.75 |
|                       |                                      |                                                 |                       | Yes                                     | 1.98                     | 0.69–5.73 |
|                       |                                      | Documented                                      | 483                   | No                                      | 2.53                     | 0.83–7.72 |
|                       |                                      |                                                 |                       | Yes                                     | 2.49                     | 0.82–7.55 |
|                       | Confirmed (suspected considered HUS) | Documented or reported                          | 481                   | No                                      | 1.67                     | 0.59–4.74 |
|                       |                                      |                                                 |                       | Yes                                     | 1.65                     | 0.58–4.66 |
|                       |                                      | Documented                                      | 500                   | No                                      | 2.02                     | 0.69–5.96 |
|                       |                                      |                                                 |                       | Yes                                     | 1.97                     | 0.67–5.77 |

Abbreviations: HUS, hemolytic uremic syndrome; WBC, white blood cell count; CI, confidence interval.

<sup>a</sup> Models in category A assumed that test results for patients with missing results of any test used to define HUS would have been normal (i.e., not indicative of HUS) had they been performed. Models in category B excluded any patient missing data for any test used to define HUS (creatinine, platelets, hemoglobin or hematocrit, or peripheral blood smear).

<sup>b</sup> Confirmed HUS was defined as including all of the following abnormalities during the first 10 days of illness: 1) hemoglobin or hematocrit below age- and gender-specific thresholds, 2) fragmented erythrocytes on peripheral blood smear, 3) platelets  $<150 \times 10^9/L$ , and 4) serum creatinine  $\geq 88.4 \mu\text{mol/L}$  if  $<13$  years old or  $\geq 132.6 \mu\text{mol/L}$  if  $\geq 13$  years old; Suspected HUS was defined as illness diagnosed by a treating clinician as HUS or thrombotic thrombocytopenic purpura in a patient with fragmented erythrocytes on peripheral blood smear, but lacking complete laboratory documentation required for a confirmed case.

<sup>c</sup> Documented exposure was defined as identification of antibiotic administration or prescription in medical records; reported exposure was defined as patient- (or legal guardian) reported exposure.

<sup>d</sup> In models that included the initial WBC value during the first 10 days of illness (and before HUS diagnosis) as a covariate, a dichotomous variable was used (WBC  $\geq 17.2 \times 10^9/L$  versus  $<17.2 \times 10^9/L$ ); patients with no WBC count documented were assumed to have WBC  $<17.2 \times 10^9/L$ .

<sup>e</sup> All models adjusted for age quartile, time to healthcare presentation, and patient- (or parent/guardian) reported fever, vomiting, and acetaminophen use.

<sup>f</sup> This is the primary model and these modelling assumptions were used for Table 3.

**Supplementary Table S3.** Secondary models for the association between metronidazole treatment during the first 7 days of illness and development of HUS.

| Category <sup>a</sup> | HUS definition <sup>b</sup>          | Source of antibiotic exposure data <sup>c</sup> | No. patients included | WBC included as covariate <sup>d</sup> | Adjusted OR <sup>e</sup> | 95% CI    |
|-----------------------|--------------------------------------|-------------------------------------------------|-----------------------|----------------------------------------|--------------------------|-----------|
| A                     | Confirmed or suspected               | Documented or reported                          | 971                   | No                                     | 1.42                     | 0.57-3.54 |
|                       |                                      |                                                 |                       | Yes                                    | 1.55                     | 0.62-3.89 |
|                       |                                      | Documented                                      | 1009                  | No                                     | 1.75                     | 0.70-4.35 |
|                       |                                      |                                                 |                       | Yes                                    | 1.86                     | 0.75-4.65 |
|                       | Confirmed (suspected excluded)       | Documented or reported                          | 952                   | No                                     | 1.40                     | 0.53-3.74 |
|                       |                                      |                                                 |                       | Yes                                    | 1.46                     | 0.54-3.90 |
|                       |                                      | Documented                                      | 990                   | No <sup>f</sup>                        | 1.72                     | 0.65-4.59 |
|                       |                                      |                                                 |                       | Yes                                    | 1.76                     | 0.66-4.70 |
|                       | Confirmed (suspected considered HUS) | Documented or reported                          | 971                   | No                                     | 1.43                     | 0.54-3.81 |
|                       |                                      |                                                 |                       | Yes                                    | 1.46                     | 0.55-3.90 |
| B                     | Confirmed (suspected excluded)       | Documented or reported                          | 624                   | No                                     | 1.38                     | 0.50-3.79 |
|                       |                                      |                                                 |                       | Yes                                    | 1.38                     | 0.50-3.81 |
|                       |                                      | Documented                                      | 633                   | No                                     | 1.30                     | 0.48-3.56 |
|                       |                                      |                                                 |                       | Yes                                    | 1.30                     | 0.48-3.56 |
|                       | Confirmed (suspected considered HUS) | Documented or reported                          | 642                   | No                                     | 1.40                     | 0.51-3.83 |
|                       |                                      |                                                 |                       | Yes                                    | 1.38                     | 0.50-3.81 |
|                       |                                      | Documented                                      | 651                   | No                                     | 1.32                     | 0.49-3.60 |
|                       |                                      |                                                 |                       | Yes                                    | 1.30                     | 0.48-2.38 |

Abbreviations: HUS, hemolytic uremic syndrome; WBC, white blood cell count; CI, confidence interval.

<sup>a</sup> Models in category A assumed that test results for patients with missing results of any test used to define HUS would have been normal (i.e., not indicative of HUS) had they been performed. Models in category B excluded any patient missing data for any test used to define HUS (creatinine, platelets, hemoglobin or hematocrit, or peripheral blood smear).

<sup>b</sup> Confirmed HUS was defined as including all of the following abnormalities during the first 10 days of illness: 1) hemoglobin or hematocrit below age- and gender-specific thresholds, 2) fragmented erythrocytes on peripheral blood smear, 3) platelets  $<150 \times 10^9/L$ , and 4) serum creatinine  $\geq 88.4 \mu\text{mol/L}$  if  $<13$  years old or  $\geq 132.6 \mu\text{mol/L}$  if  $\geq 13$  years old; Suspected HUS was defined as illness diagnosed by a treating clinician as HUS or thrombotic thrombocytopenic

purpura in a patient with fragmented erythrocytes on peripheral blood smear, but lacking complete laboratory documentation required for a confirmed case.

<sup>e</sup> Documented exposure was defined as identification of antibiotic administration or prescription in medical records; reported exposure was defined as patient- (or legal guardian) reported exposure.

<sup>d</sup> In models that included the initial WBC value during the first 10 days of illness (and before HUS diagnosis) as a covariate, a dichotomous variable was used (WBC  $\geq 17.2 \times 10^9/L$  versus  $< 17.2 \times 10^9/L$ ); patients with no WBC count documented were assumed to have WBC  $< 17.2 \times 10^9/L$ .

<sup>e</sup> All models adjusted for age quartile, time to healthcare presentation, and patient- (or parent/guardian) reported fever, vomiting, and acetaminophen use.

<sup>f</sup> This is the primary model and these modelling assumptions were used for Table 3.

**Supplementary Table S4.** Secondary models for the association between fluoroquinolone treatment during the first 7 days of illness and development of HUS.

| Category <sup>a</sup> | HUS definition <sup>b</sup>             | Source of antibiotic exposure data <sup>c</sup> | No. patients included | WBC included as covariate? <sup>d</sup> | Adjusted OR <sup>e</sup> | 95% CI    |
|-----------------------|-----------------------------------------|-------------------------------------------------|-----------------------|-----------------------------------------|--------------------------|-----------|
| A                     | Confirmed or suspected                  | Documented or reported                          | 1020                  | No                                      | 0.48                     | 0.10-2.39 |
|                       |                                         | Documented or reported                          |                       | Yes                                     | 0.49                     | 0.10-2.41 |
|                       |                                         | Documented                                      | 1042                  | No                                      | 0.28                     | 0.04-2.11 |
|                       |                                         | Documented                                      |                       | Yes                                     | 0.29                     | 0.04-2.12 |
|                       | Confirmed (suspected excluded)          | Documented or reported                          | 1002                  | No                                      | 0.57                     | 0.11-3.02 |
|                       |                                         | Documented or reported                          |                       | Yes                                     | 0.57                     | 0.11-3.03 |
|                       |                                         | Documented                                      | 1024                  | No <sup>f</sup>                         | 0.30                     | 0.04-2.53 |
|                       |                                         | Documented                                      |                       | Yes                                     | 0.31                     | 0.04-2.55 |
|                       | Confirmed (suspected considered HUS) no | Documented or reported                          | 1020                  | No                                      | 0.58                     | 0.11-3.03 |
|                       |                                         | Documented or reported                          |                       | Yes                                     | 0.58                     | 0.11-3.04 |
| B                     | Confirmed (suspected excluded)          | Documented                                      | 1042                  | No                                      | 0.30                     | 0.04-2.54 |
|                       |                                         | Documented                                      |                       | Yes                                     | 0.31                     | 0.04-2.55 |
|                       |                                         | Documented or reported                          | 645                   | No                                      | 0.52                     | 0.10-2.80 |
|                       |                                         | Documented or reported                          |                       | Yes                                     | 0.51                     | 0.09-2.79 |
|                       | Confirmed (suspected considered HUS) no | Documented                                      | 650                   | No                                      | 0.24                     | 0.03-2.04 |
|                       |                                         | Documented                                      |                       | Yes                                     | 0.24                     | 0.03-2.03 |
|                       |                                         | Documented or reported                          | 662                   | No                                      | 0.51                     | 0.09-2.76 |
|                       |                                         | Documented or reported                          |                       | Yes                                     | 0.50                     | 0.09-2.72 |
|                       | Confirmed (suspected considered HUS) no | Documented                                      | 667                   | No                                      | 0.24                     | 0.03-2.01 |
|                       |                                         | Documented                                      |                       | Yes                                     | 0.23                     | 0.03-1.98 |

Abbreviations: HUS, hemolytic uremic syndrome; WBC, white blood cell count; CI, confidence interval.

<sup>a</sup> Models in category A assumed that test results for patients with missing results of any test used to define HUS would have been normal (i.e., not indicative of HUS) had they been performed. Models in category B excluded any patient missing data for any test used to define HUS (creatinine, platelets, hemoglobin or hematocrit, or peripheral blood smear).

<sup>b</sup> Confirmed HUS was defined as including all of the following abnormalities during the first 10 days of illness: 1) hemoglobin or hematocrit below age- and gender-specific thresholds, 2) fragmented erythrocytes on peripheral blood smear, 3) platelets  $< 150 \times 10^9/L$ , and 4) serum creatinine  $\geq 88.4 \mu\text{mol/L}$  if  $< 13$  years old or  $\geq 132.6 \mu\text{mol/L}$  if  $\geq 13$  years old; Suspected HUS was defined as illness diagnosed by a treating clinician as HUS or thrombotic thrombocytopenic purpura in a patient with fragmented erythrocytes on peripheral blood smear, but lacking complete laboratory documentation required for a confirmed case.

<sup>c</sup> Documented exposure was defined as identification of antibiotic administration or prescription in medical records; reported exposure was defined as patient- (or legal guardian) reported exposure.

<sup>d</sup> In models that included the initial WBC value during the first 10 days of illness (and before HUS diagnosis) as a covariate, a dichotomous variable was used (WBC  $\geq 17.2 \times 10^9/L$  versus  $< 17.2 \times 10^9/L$ ); patients with no WBC count documented were assumed to have WBC  $< 17.2 \times 10^9/L$ .

<sup>e</sup> All models adjusted for age quartile, time to healthcare presentation, and patient- (or parent/guardian) reported fever, vomiting, and acetaminophen use.

<sup>f</sup> This is the primary model and these modelling assumptions were used for Table 3.
