# Supplementary material for: Risk of Hemolytic Uremic Syndrome Related to Treatment of Escherichia coli O157 Infection with Different Antimicrobial Classes
Source: Microorganisms. 2021 Sep 21;9(9):1997. doi: 10.3390/microorganisms9091997 (PMC8466573; doi:10.3390/microorganisms9091997)
Supplement: Supplementary file 1 [file microorganisms-09-01997-s001.zip]

Archive with 5 entries (5 files):
- Antibiotic Follow-up Form.pdf
- Hospital Form.pdf
- Main Form.pdf
- Medical Provider Form.pdf
- microorganisms-1367413-supplementary.pdf
